# Supplementary material for: Computational Prediction of Neutralization Epitopes Targeted by Human Anti-V3 HIV Monoclonal Antibodies
Source: PubMed Central journal article supplement (PMC3934971; doi:10.1371/journal.pone.0089987), 2014-02-25
Supplement: pone.0089987.s001.pdf [file pone.0089987.s001.pdf]

# Supplementary Figure S1

a

| Sequence name                        | V3 loop Sequence |   |   |   |   |   |   |   |   |    |    |    |    |    |    |    |    |    |    |    |    |    |    |    |    |    |     |    |    |    |    |    |    |    |     | mAb     |           |         |
|--------------------------------------|------------------|---|---|---|---|---|---|---|---|----|----|----|----|----|----|----|----|----|----|----|----|----|----|----|----|----|-----|----|----|----|----|----|----|----|-----|---------|-----------|---------|
|                                      | 1                | 2 | 3 | 4 | 5 | 6 | 7 | 8 | 9 | 10 | 11 | 12 | 13 | 14 | 15 | 16 | 17 | 18 | 19 | 20 | 21 | 22 | 23 | 24 | 25 | 26 | 27  | 28 | 29 | 30 | 31 | 32 | 33 | 34 | 35  | 2219    | 447-52D   |         |
| Consensus A1                         | C                | T | R | P | N | N | N | T | R | K  | S  | I  | R  | I  | G  | P  | G  | Q  | A  | F  | Y  | A  | T  | G  | D  | I  | I   | G  | D  | I  | R  | Q  | A  | H  | C   | 0.029   | 0.58      |         |
| Consensus AE                         | C                | T | R | P | S | N | N | T | R | T  | S  | I  | T  | I  | G  | P  | G  | Q  | V  | F  | Y  | R  | T  | G  | D  | I  | I   | G  | D  | I  | R  | K  | A  | Y  | C   | 0.23    | 1.2       |         |
| Consensus B                          | C                | T | R | P | N | N | N | T | R | K  | S  | I  | H  | I  | G  | P  | G  | R  | A  | F  | Y  | T  | T  | G  | E  | I  | I   | G  | D  | I  | R  | Q  | A  | H  | C   | 0.0011  | 0.00061   |         |
| Consensus B-D29A                     | C                | T | R | P | N | N | N | T | R | K  | S  | I  | H  | I  | G  | P  | G  | R  | A  | F  | Y  | T  | T  | G  | E  | I  | I   | G  | A  | I  | R  | Q  | A  | H  | C   | 0.0012  | 0.00026   |         |
| Consensus B-D29N                     | C                | T | R | P | N | N | N | T | R | K  | S  | I  | H  | I  | G  | P  | G  | R  | A  | F  | Y  | T  | T  | G  | E  | I  | I   | G  | N  | I  | R  | Q  | A  | H  | C   | 0.00084 | 0.00027   |         |
| Consensus B-H13P                     | C                | T | R | P | N | N | N | T | R | K  | S  | I  | P  | I  | G  | P  | G  | R  | A  | F  | Y  | T  | T  | G  | E  | I  | I   | G  | D  | I  | R  | Q  | A  | H  | C   | 0.00016 | 0.00048   |         |
| Consensus B-H13P-I14M                | C                | T | R | P | N | N | N | T | R | K  | S  | I  | P  | M  | G  | P  | G  | R  | A  | F  | Y  | T  | T  | G  | E  | I  | I   | G  | D  | I  | R  | Q  | A  | H  | C   | 0.021   | 0.00078   |         |
| Consensus B-H13R-T22A-E25D           | C                | T | R | P | N | N | N | T | R | K  | S  | I  | R  | I  | G  | P  | G  | R  | A  | F  | Y  | A  | T  | G  | D  | I  | I   | G  | D  | I  | R  | Q  | A  | H  | C   | 0.001   | 0.0011    |         |
| Consensus B-H13T-R18Q-A19T-T22A-E25D | C                | T | R | P | N | N | N | T | R | K  | S  | I  | T  | I  | G  | P  | G  | Q  | T  | F  | Y  | A  | T  | G  | D  | I  | I   | G  | D  | I  | R  | Q  | A  | H  | C   | 6.6     | >20       |         |
| Consensus B-H13T-T22A-E25D           | C                | T | R | P | N | N | N | T | R | K  | S  | I  | T  | I  | G  | P  | G  | R  | A  | F  | Y  | A  | T  | G  | D  | I  | I   | G  | D  | I  | R  | Q  | A  | H  | C   | 0.0044  | 0.067     |         |
| Consensus B-I12M                     | C                | T | R | P | N | N | N | T | R | K  | S  | M  | H  | I  | G  | P  | G  | R  | A  | F  | Y  | T  | T  | G  | E  | I  | I   | G  | D  | I  | R  | Q  | A  | H  | C   | 0.012   | 0.00037   |         |
| Consensus B-I12M-H13R                | C                | T | R | P | N | N | N | T | R | K  | S  | M  | R  | I  | G  | P  | G  | R  | A  | F  | Y  | T  | T  | G  | E  | I  | I   | G  | D  | I  | R  | Q  | A  | H  | C   | 0.0032  | <0.000128 |         |
| Consensus B-I12V                     | C                | T | R | P | N | N | N | T | R | K  | S  | V  | H  | I  | G  | P  | G  | R  | A  | F  | Y  | T  | T  | G  | E  | I  | I   | G  | D  | I  | R  | Q  | A  | H  | C   | 0.0012  | 0.00021   |         |
| Consensus B-I12V-H13R-T22A-E25D      | C                | T | R | P | N | N | N | T | R | K  | S  | V  | R  | I  | G  | P  | G  | R  | A  | F  | Y  | A  | T  | G  | D  | I  | I   | G  | D  | I  | R  | Q  | A  | H  | C   | 0.00052 | 0.00025   |         |
| Consensus B-I14L                     | C                | T | R | P | N | N | N | T | R | K  | S  | I  | H  | L  | G  | P  | G  | R  | A  | F  | Y  | T  | T  | G  | E  | I  | I   | G  | D  | I  | R  | Q  | A  | H  | C   | 0.00066 | 0.00026   |         |
| Consensus B-I14M                     | C                | T | R | P | N | N | N | T | R | K  | S  | I  | H  | M  | G  | P  | G  | R  | A  | F  | Y  | T  | T  | G  | E  | I  | I   | G  | D  | I  | R  | Q  | A  | H  | C   | 0.001   | 0.00026   |         |
| Consensus B-K10A                     | C                | T | R | P | N | N | N | T | R | A  | S  | I  | H  | I  | G  | P  | G  | R  | A  | F  | Y  | T  | T  | G  | E  | I  | I   | G  | D  | I  | R  | Q  | A  | H  | C   | 0.19    | 0.00038   |         |
| Consensus B-K10E                     | C                | T | R | P | N | N | N | T | R | E  | S  | I  | H  | I  | G  | P  | G  | R  | A  | F  | Y  | T  | T  | G  | E  | I  | I   | G  | D  | I  | R  | Q  | A  | H  | C   | >20     | 0.00033   |         |
| Consensus B-P16A                     | C                | T | R | P | N | N | N | T | R | K  | S  | I  | H  | I  | G  | A  | G  | R  | A  | F  | Y  | T  | T  | G  | E  | I  | I   | G  | D  | I  | R  | Q  | A  | H  | C   | 0.00056 | 0.0011    |         |
| Consensus B-R18K                     | C                | T | R | P | N | N | N | T | R | K  | S  | I  | H  | I  | G  | P  | G  | K  | A  | F  | Y  | T  | T  | G  | E  | I  | I   | G  | D  | I  | R  | Q  | A  | H  | C   | 0.00076 | 0.0068    |         |
| Consensus B-R18Q                     | C                | T | R | P | N | N | N | T | R | K  | S  | I  | H  | I  | G  | P  | G  | Q  | A  | F  | Y  | T  | T  | G  | E  | I  | I   | G  | D  | I  | R  | Q  | A  | H  | C   | 0.0012  | 0.4       |         |
| Consensus B-R3A                      | C                | T | A | P | N | N | N | T | R | K  | S  | I  | H  | I  | G  | P  | G  | R  | A  | F  | Y  | T  | T  | G  | E  | I  | I   | G  | D  | I  | R  | Q  | A  | H  | C   | 0.00053 | 0.00027   |         |
| Consensus B-R3Q                      | C                | T | Q | P | N | N | N | T | R | K  | S  | I  | H  | I  | G  | P  | G  | R  | A  | F  | Y  | T  | T  | G  | E  | I  | I   | G  | D  | I  | R  | Q  | A  | H  | C   | 0.00053 | 0.00037   |         |
| Consensus B-R9A                      | C                | T | R | P | N | N | N | T | A | K  | S  | I  | H  | I  | G  | P  | G  | R  | A  | F  | Y  | T  | T  | G  | E  | I  | I   | G  | D  | I  | R  | Q  | A  | H  | C   | 0.0007  | 0.0005    |         |
| Consensus B-R9E                      | C                | T | R | P | N | N | N | T | E | K  | S  | I  | H  | I  | G  | P  | G  | R  | A  | F  | Y  | T  | T  | G  | E  | I  | I   | G  | D  | I  | R  | Q  | A  | H  | C   | 0.004   | 0.0031    |         |
| Consensus B-T22A                     | C                | T | R | P | N | N | N | T | R | K  | S  | I  | H  | I  | G  | P  | G  | R  | A  | F  | Y  | A  | T  | G  | E  | I  | I   | G  | D  | I  | R  | Q  | A  | H  | C   | 0.0023  | 0.0013    |         |
| Consensus B-T22A-E25D                | C                | T | R | P | N | N | N | T | R | K  | S  | I  | H  | I  | G  | P  | G  | R  | A  | F  | Y  | A  | T  | G  | D  | I  | I   | G  | D  | I  | R  | Q  | A  | H  | C   | 0.0041  | 0.0024    |         |
| Consensus B-T22A-Q32K                | C                | T | R | P | N | N | N | T | R | K  | S  | I  | H  | I  | G  | P  | G  | R  | A  | F  | Y  | A  | T  | G  | E  | I  | I   | G  | D  | I  | R  | K  | A  | H  | C   | 0.00061 | 0.00049   |         |
| Consensus B-T8I                      | C                | T | R | P | N | N | N | T | I | R  | K  | S  | I  | H  | I  | G  | P  | G  | R  | A  | F  | Y  | T  | T  | G  | E  | I   | I  | G  | D  | I  | R  | Q  | A  | H   | C       | 0.00042   | 0.00027 |
| Consensus C                          | C                | T | R | P | N | N | N | T | R | K  | S  | I  | R  | I  | G  | P  | G  | Q  | T  | F  | Y  | A  | T  | G  | D  | I  | I   | G  | D  | I  | R  | Q  | A  | H  | C   | 0.15    | >20       |         |
| Consensus C-D25E                     | C                | T | R | P | N | N | N | T | R | K  | S  | I  | R  | I  | G  | P  | G  | Q  | T  | F  | Y  | A  | T  | G  | E  | I  | I   | G  | D  | I  | R  | Q  | A  | H  | C   | 0.35    | >20       |         |
| Consensus C-I12M-D25E                | C                | T | R | P | N | N | N | T | R | K  | S  | M  | R  | I  | G  | P  | G  | Q  | T  | F  | Y  | A  | T  | G  | E  | I  | I   | G  | D  | I  | R  | Q  | A  | H  | C   | 0.23    | 0.55      |         |
| Consensus C-I12M-R13P-T19A-D25E      | C                | T | R | P | N | N | N | T | R | K  | S  | M  | P  | I  | G  | P  | G  | Q  | A  | F  | Y  | A  | T  | G  | E  | I  | I   | G  | D  | I  | R  | Q  | A  | H  | C   | >20     | >20       |         |
| Consensus C-I12M-R13S-T19A-D25E      | C                | T | R | P | N | N | N | T | R | K  | S  | M  | S  | I  | G  | P  | G  | Q  | A  | F  | Y  | A  | T  | G  | E  | I  | I   | G  | D  | I  | R  | Q  | A  | H  | C   | >20     | >20       |         |
| Consensus C-I12V                     | C                | T | R | P | N | N | N | T | R | K  | S  | V  | R  | I  | G  | P  | G  | Q  | T  | F  | Y  | A  | T  | G  | D  | I  | I   | G  | D  | I  | R  | Q  | A  | H  | C   | 0.054   | 0.76      |         |
| Consensus C-I14F-D25E                | C                | T | R | P | N | N | N | T | R | K  | S  | I  | R  | F  | G  | P  | G  | Q  | T  | F  | Y  | A  | T  | G  | E  | I  | I   | G  | D  | I  | R  | Q  | A  | H  | C   | 0.1     | 0.96      |         |
| Consensus C-I14L-D25E                | C                | T | R | P | N | N | N | T | R | K  | S  | I  | R  | L  | G  | P  | G  | Q  | T  | F  | Y  | A  | T  | G  | E  | I  | I   | G  | D  | I  | R  | Q  | A  | H  | C   | 2.3     | >20       |         |
| Consensus C-I14M-D25E                | C                | T | R | P | N | N | N | T | R | K  | S  | I  | R  | M  | G  | P  | G  | Q  | T  | F  | Y  | A  | T  | G  | E  | I  | I   | G  | D  | I  | R  | Q  | A  | H  | C   | 0.034   | 12.1      |         |
| Consensus C-I14V-D25E                | C                | T | R | P | N | N | N | T | R | K  | S  | I  | R  | V  | G  | P  | G  | Q  | T  | F  | Y  | A  | T  | G  | E  | I  | I   | G  | D  | I  | R  | Q  | A  | H  | C   | 0.01    | 0.45      |         |
| Consensus C-K10A-D25E                | C                | T | R | P | N | N | N | T | R | A  | S  | I  | R  | I  | G  | P  | G  | Q  | T  | F  | Y  | A  | T  | G  | E  | I  | I   | G  | D  | I  | R  | Q  | A  | H  | C   | >20     | 0.025     |         |
| Consensus C-K10A-I14M-D25E           | C                | T | R | P | N | N | N | T | R | A  | S  | I  | R  | M  | G  | P  | G  | Q  | T  | F  | Y  | A  | T  | G  | E  | I  | I   | G  | D  | I  | R  | Q  | A  | H  | C   | >20     | 6.5       |         |
| Consensus C-K10E-D25E                | C                | T | R | P | N | N | N | T | R | E  | S  | I  | R  | I  | G  | P  | G  | Q  | T  | F  | Y  | A  | T  | G  | E  | I  | I   | G  | D  | I  | R  | Q  | A  | H  | C   | >20     | 1         |         |
| Consensus C-K10R-R13P-I14V-D25E      | C                | T | R | P | N | N | N | T | R | S  | I  | P  | V  | G  | P  | G  | Q  | T  | F  | Y  | A  | T  | G  | E  | I  | I  | G   | D  | I  | R  | Q  | A  | H  | C  | >20 | >20     |           |         |
| Consensus C-R13N-I14F-T19A           | C                | T | R | P | N | N | N | T | R | K  | S  | I  | N  | F  | G  | P  | G  | Q  | A  | F  | Y  | A  | T  | G  | D  | I  | I   | G  | D  | I  | R  | Q  | A  | H  | C   | 0.036   | >20       |         |
| Consensus C-R13P-T19A-D25E           | C                | T | R | P | N | N | N | T | R | K  | S  | I  | P  | I  | G  | P  | G  | Q  | A  | F  | Y  | A  | T  | G  | E  | I  | I   | G  | D  | I  | R  | Q  | A  | H  | C   | 5       | >20       |         |
| Consensus C-R13S-T19A-D25E           | C                | T | R | P | N | N | N | T | R | K  | S  | I  | S  | I  | G  | P  | G  | Q  | A  | F  | Y  | A  | T  | G  | E  | I  | I   | G  | D  | I  | R  | Q  | A  | H  | C   | 1.1     | >20       |         |
| Consensus C-R13T-I14F-T19A-D25E      | C                | T | R | P | N | N | N | T | R | K  | S  | I  | T  | F  | G  | P  | G  | Q  | A  | F  | Y  | A  | T  | G  | E  | I  | I   | G  | D  | I  | R  | Q  | A  | H  | C   | 0.075   | >20       |         |
| Consensus C-R13T-I14L-T19A-D25E      | C                | T | R | P | N | N | N | T | R | K  | S  | I  | T  | L  | G  | P  | G  | Q  | A  | F  | Y  | A  | T  | G  | E  | I  | I   | G  | D  | I  | R  | Q  | A  | H  | C   | 12      | >20       |         |
| Consensus C-R9A-D25E                 | C                | T | R | P | N | N | N | T | A | K  | S  | I  | R  | I  | G  | P  | G  | Q  | T  | F  | Y  | A  | T  | G  | E  | I  | I   | G  | D  | I  | R  | Q  | A  | H  | C   | 3.5     | >20       |         |
| Consensus C-R9A-I14V-D25E            | C                | T | R | P | N | N | N | T | A | K  | S  | I  | R  | V  | G  | P  | G  | Q  | T  | F  | Y  | A  | T  | G  | E  | I  | I   | G  | D  | I  | R  | Q  | A  | H  | C   | 0.082   | >20       |         |
| Consensus C-R9A-R13G-D25E            | C                | T | R | P | N | N | N | T | A | K  | S  | I  | G  | I  | G  | P  | G  | Q  | T  | F  | Y  | A  | T  | G  | E  | I  | I   | G  | D  | I  | R  | Q  | A  | H  | C   | >20     | >20       |         |
| Consensus C-R9E-D25E                 | C                | T | R | P | N | N | N | T | E | K  | S  | I  | R  | I  | G  | P  | G  | Q  | T  | F  | Y  | A  | T  | G  | E  | I  | I   | G  | D  | I  | R  | Q  | A  | H  | C   | 3.6     | >20       |         |
| Consensus C-R9I-I12M-R13G-D25E       | C                | T | R | P | N | N | N | T | I | K  | S  | M  | G  | I  | G  | P  | G  | Q  | T  | F  | Y  | A  | T  | G  | E  | I  | I   | G  | D  | I  | R  | Q  | A  | H  | C   | >20     | >20       |         |
| Consensus C-R9I-K10Q-I12M-R13G-D25E  | C                | T | R | P | N | N | N | T | I | Q  | S  | M  | G  | I  | G  | P  | G  | Q  | T  | F  | Y  | A  | T  | G  | E  | I  | I   | G  | D  | I  | R  | Q  | A  | H  | C   | >20     | >20       |         |
| Consensus C-R9Q-I14V-D25E            | C                | T | R | P | N | N | N | T | Q | K  | S  | I  | R  | V  | G  | P  | G  | Q  | T  | F  | Y  | A  | T  | G  | E  | I  | I</ |    |    |    |    |    |    |    |     |         |           |         |
