# Supplementary material for: Computational Prediction of Neutralization Epitopes Targeted by Human Anti-V3 HIV Monoclonal Antibodies
Source: PubMed Central journal article supplement (PMC3934971; doi:10.1371/journal.pone.0089987), 2014-02-25
Supplement: pone.0089987.s002.pdf [file pone.0089987.s002.pdf]

Supplementary Figure S2

a

| Docking peptide: |     | mAb 2219 conformation: |      |      |              |              |              |                      |
|------------------|-----|------------------------|------|------|--------------|--------------|--------------|----------------------|
| Start            | End | 2B0S                   | 2B1A | 2B1H | 2B0S<br>2B1A | 2B1A<br>2B1H | 2B0S<br>2B1H | 2B0S<br>2B1A<br>2B1H |
| 10               | 21  | 0.95                   | 0.87 | 0.92 | 0.94         | 0.91         | 0.96         | 0.95                 |
| 10               | 20  | 0.93                   | 0.87 | 0.89 | 0.90         | 0.87         | 0.91         | 0.89                 |
| 10               | 19  | 0.93                   | 0.87 | 0.89 | 0.91         | 0.88         | 0.92         | 0.91                 |
| 10               | 18  | 0.95                   | 0.91 | 0.91 | 0.94         | 0.92         | 0.94         | 0.94                 |
| 10               | 17  | 0.94                   | 0.91 | 0.86 | 0.93         | 0.90         | 0.94         | 0.93                 |
| 10               | 16  | 0.94                   | 0.92 | 0.91 | 0.95         | 0.93         | 0.94         | 0.95                 |
| 10               | 15  | 0.94                   | 0.93 | 0.92 | 0.95         | 0.94         | 0.95         | 0.95                 |
| 10               | 14  | 0.94                   | 0.93 | 0.93 | 0.95         | 0.94         | 0.95         | 0.95                 |
| 10               | 13  | 0.96                   | 0.92 | 0.92 | 0.94         | 0.91         | 0.94         | 0.93                 |
| 9                | 20  | 0.91                   | 0.89 | 0.88 | 0.90         | 0.89         | 0.91         | 0.91                 |
| 9                | 19  | 0.91                   | 0.87 | 0.90 | 0.90         | 0.88         | 0.91         | 0.90                 |
| 9                | 18  | 0.91                   | 0.90 | 0.91 | 0.91         | 0.91         | 0.92         | 0.92                 |
| 9                | 17  | 0.91                   | 0.89 | 0.89 | 0.91         | 0.90         | 0.92         | 0.92                 |
| 9                | 16  | 0.90                   | 0.89 | 0.89 | 0.90         | 0.90         | 0.91         | 0.91                 |
| 9                | 15  | 0.91                   | 0.90 | 0.89 | 0.91         | 0.91         | 0.91         | 0.91                 |
| 9                | 14  | 0.90                   | 0.90 | 0.89 | 0.91         | 0.90         | 0.91         | 0.91                 |
| 9                | 13  | 0.94                   | 0.91 | 0.92 | 0.92         | 0.91         | 0.93         | 0.92                 |
| 8                | 19  | 0.92                   | 0.91 | 0.88 | 0.92         | 0.91         | 0.91         | 0.92                 |
| 8                | 18  | 0.91                   | 0.91 | 0.90 | 0.91         | 0.91         | 0.91         | 0.91                 |
| 8                | 17  | 0.91                   | 0.91 | 0.86 | 0.92         | 0.91         | 0.91         | 0.92                 |
| 8                | 16  | 0.91                   | 0.91 | 0.85 | 0.92         | 0.91         | 0.91         | 0.91                 |
| 8                | 15  | 0.90                   | 0.91 | 0.87 | 0.91         | 0.91         | 0.90         | 0.91                 |
| 8                | 14  | 0.91                   | 0.92 | 0.89 | 0.92         | 0.92         | 0.91         | 0.92                 |
| 8                | 13  | 0.95                   | 0.93 | 0.90 | 0.94         | 0.93         | 0.94         | 0.94                 |
| 7                | 18  | 0.91                   | 0.90 | 0.86 | 0.92         | 0.91         | 0.91         | 0.92                 |
| 7                | 17  | 0.91                   | 0.88 | 0.81 | 0.92         | 0.89         | 0.91         | 0.92                 |
| 7                | 16  | 0.91                   | 0.87 | 0.85 | 0.92         | 0.91         | 0.91         | 0.91                 |
| 7                | 15  | 0.90                   | 0.87 | 0.85 | 0.91         | 0.90         | 0.91         | 0.92                 |
| 7                | 14  | 0.90                   | 0.88 | 0.83 | 0.91         | 0.90         | 0.90         | 0.91                 |
| 7                | 13  | 0.94                   | 0.87 | 0.88 | 0.94         | 0.91         | 0.94         | 0.94                 |
| 6                | 17  | 0.90                   | 0.88 | 0.77 | 0.91         | 0.87         | 0.90         | 0.91                 |
| 6                | 16  | 0.91                   | 0.87 | 0.79 | 0.91         | 0.87         | 0.91         | 0.91                 |
| 6                | 15  | 0.90                   | 0.88 | 0.81 | 0.91         | 0.89         | 0.91         | 0.91                 |
| 6                | 14  | 0.92                   | 0.88 | 0.83 | 0.92         | 0.90         | 0.92         | 0.93                 |
| 6                | 13  | 0.94                   | 0.81 | 0.87 | 0.93         | 0.85         | 0.94         | 0.93                 |
| 5                | 16  | 0.92                   | 0.86 | 0.79 | 0.92         | 0.86         | 0.92         | 0.92                 |
| 5                | 15  | 0.91                   | 0.82 | 0.80 | 0.92         | 0.87         | 0.91         | 0.92                 |
| 5                | 14  | 0.91                   | 0.85 | 0.79 | 0.92         | 0.87         | 0.91         | 0.92                 |
| 5                | 13  | 0.93                   | 0.79 | 0.81 | 0.92         | 0.82         | 0.93         | 0.92                 |
| 4                | 15  | 0.88                   | 0.84 | 0.77 | 0.89         | 0.85         | 0.89         | 0.90                 |
| 4                | 14  | 0.90                   | 0.81 | 0.76 | 0.90         | 0.84         | 0.90         | 0.90                 |
| 4                | 13  | 0.92                   | 0.86 | 0.76 | 0.93         | 0.87         | 0.93         | 0.93                 |
| 3                | 14  | 0.81                   | 0.78 | 0.75 | 0.85         | 0.78         | 0.85         | 0.86                 |
| 3                | 13  | 0.82                   | 0.69 | 0.71 | 0.83         | 0.71         | 0.85         | 0.84                 |
| 2                | 13  | 0.73                   | 0.57 | 0.70 | 0.70         | 0.62         | 0.75         | 0.74                 |

b

| Docking peptide: |     | mAb 2219 conformation: |      |      |              |              |              |                      |
|------------------|-----|------------------------|------|------|--------------|--------------|--------------|----------------------|
| Start            | End | 2B0S                   | 2B1A | 2B1H | 2B0S<br>2B1A | 2B1A<br>2B1H | 2B0S<br>2B1H | 2B0S<br>2B1A<br>2B1H |
| 10               | 21  | 0.03                   | 0.05 | 0.04 | 0.03         | 0.04         | 0.03         | 0.03                 |
| 10               | 20  | 0.04                   | 0.07 | 0.06 | 0.05         | 0.07         | 0.05         | 0.06                 |
| 10               | 19  | 0.04                   | 0.06 | 0.05 | 0.04         | 0.05         | 0.04         | 0.04                 |
| 10               | 18  | 0.03                   | 0.04 | 0.04 | 0.03         | 0.04         | 0.03         | 0.03                 |
| 10               | 17  | 0.03                   | 0.05 | 0.06 | 0.04         | 0.05         | 0.03         | 0.04                 |
| 10               | 16  | 0.03                   | 0.04 | 0.04 | 0.03         | 0.04         | 0.03         | 0.03                 |
| 10               | 15  | 0.03                   | 0.03 | 0.04 | 0.03         | 0.03         | 0.03         | 0.03                 |
| 10               | 14  | 0.03                   | 0.03 | 0.03 | 0.03         | 0.03         | 0.03         | 0.03                 |
| 10               | 13  | 0.03                   | 0.04 | 0.04 | 0.03         | 0.04         | 0.03         | 0.03                 |
| 9                | 20  | 0.04                   | 0.05 | 0.05 | 0.04         | 0.05         | 0.04         | 0.04                 |
| 9                | 19  | 0.04                   | 0.05 | 0.04 | 0.04         | 0.05         | 0.04         | 0.04                 |
| 9                | 18  | 0.04                   | 0.04 | 0.04 | 0.04         | 0.04         | 0.04         | 0.04                 |
| 9                | 17  | 0.04                   | 0.05 | 0.05 | 0.04         | 0.04         | 0.04         | 0.04                 |
| 9                | 16  | 0.04                   | 0.04 | 0.04 | 0.04         | 0.04         | 0.04         | 0.04                 |
| 9                | 15  | 0.04                   | 0.04 | 0.05 | 0.04         | 0.04         | 0.04         | 0.04                 |
| 9                | 14  | 0.04                   | 0.04 | 0.04 | 0.04         | 0.04         | 0.04         | 0.04                 |
| 9                | 13  | 0.03                   | 0.04 | 0.04 | 0.03         | 0.04         | 0.03         | 0.03                 |
| 8                | 19  | 0.04                   | 0.04 | 0.05 | 0.04         | 0.04         | 0.04         | 0.04                 |
| 8                | 18  | 0.04                   | 0.04 | 0.05 | 0.04         | 0.04         | 0.04         | 0.04                 |
| 8                | 17  | 0.04                   | 0.04 | 0.06 | 0.04         | 0.04         | 0.04         | 0.04                 |
| 8                | 16  | 0.04                   | 0.04 | 0.06 | 0.04         | 0.04         | 0.04         | 0.04                 |
| 8                | 15  | 0.04                   | 0.04 | 0.06 | 0.04         | 0.04         | 0.04         | 0.04                 |
| 8                | 14  | 0.04                   | 0.04 | 0.05 | 0.04         | 0.04         | 0.04         | 0.04                 |
| 8                | 13  | 0.03                   | 0.03 | 0.05 | 0.03         | 0.03         | 0.03         | 0.03                 |
| 7                | 18  | 0.04                   | 0.04 | 0.06 | 0.04         | 0.04         | 0.04         | 0.04                 |
| 7                | 17  | 0.04                   | 0.05 | 0.08 | 0.04         | 0.05         | 0.05         | 0.04                 |
| 7                | 16  | 0.04                   | 0.05 | 0.06 | 0.04         | 0.04         | 0.04         | 0.04                 |
| 7                | 15  | 0.04                   | 0.05 | 0.06 | 0.04         | 0.05         | 0.04         | 0.04                 |
| 7                | 14  | 0.04                   | 0.05 | 0.07 | 0.04         | 0.05         | 0.04         | 0.04                 |
| 7                | 13  | 0.03                   | 0.05 | 0.05 | 0.03         | 0.04         | 0.03         | 0.03                 |
| 6                | 17  | 0.05                   | 0.05 | 0.09 | 0.04         | 0.06         | 0.05         | 0.04                 |
| 6                | 16  | 0.04                   | 0.05 | 0.08 | 0.04         | 0.05         | 0.04         | 0.04                 |
| 6                | 15  | 0.05                   | 0.04 | 0.08 | 0.04         | 0.04         | 0.04         | 0.04                 |
| 6                | 14  | 0.04                   | 0.05 | 0.07 | 0.04         | 0.05         | 0.04         | 0.04                 |
| 6                | 13  | 0.03                   | 0.06 | 0.05 | 0.03         | 0.06         | 0.03         | 0.03                 |
| 5                | 16  | 0.04                   | 0.05 | 0.08 | 0.04         | 0.06         | 0.04         | 0.04                 |
| 5                | 15  | 0.04                   | 0.06 | 0.07 | 0.04         | 0.06         | 0.04         | 0.04                 |
| 5                | 14  | 0.04                   | 0.06 | 0.08 | 0.04         | 0.06         | 0.04         | 0.04                 |
| 5                | 13  | 0.03                   | 0.07 | 0.07 | 0.04         | 0.07         | 0.03         | 0.04                 |
| 4                | 15  | 0.05                   | 0.06 | 0.09 | 0.05         | 0.06         | 0.05         | 0.05                 |
| 4                | 14  | 0.04                   | 0.06 | 0.09 | 0.04         | 0.06         | 0.04         | 0.04                 |
| 4                | 13  | 0.04                   | 0.05 | 0.08 | 0.03         | 0.05         | 0.04         | 0.03                 |
| 3                | 14  | 0.06                   | 0.08 | 0.09 | 0.06         | 0.08         | 0.06         | 0.06                 |
| 3                | 13  | 0.06                   | 0.08 | 0.09 | 0.06         | 0.08         | 0.05         | 0.05                 |
| 2                | 13  | 0.08                   | 0.11 | 0.09 | 0.07         | 0.10         | 0.08         | 0.07                 |
