# Supplementary material for: Computational Prediction of Neutralization Epitopes Targeted by Human Anti-V3 HIV Monoclonal Antibodies
Source: PubMed Central journal article supplement (PMC3934971; doi:10.1371/journal.pone.0089987), 2014-02-25
Supplement: pone.0089987.s003.pdf [file pone.0089987.s003.pdf]

# Supplementary Figure S3

a

| Docking peptide:              | Start | mAb 447-52D conformation: |      |      |      |      |      |      |      |      |      |     |    |    |    |    |    |    |    |    |    |    |
|-------------------------------|-------|---------------------------|------|------|------|------|------|------|------|------|------|-----|----|----|----|----|----|----|----|----|----|----|
|                               |       | 9                         | 9    | 9    | 9    | 8    | 8    | 8    | 7    | 7    | 6    | End | 22 | 21 | 20 | 19 | 21 | 20 | 19 | 20 | 19 | 19 |
| 1Q1Jp                         |       | 0.66                      | 0.70 | 0.81 | 0.85 | 0.62 | 0.76 | 0.81 | 0.62 | 0.66 | 0.65 |     |    |    |    |    |    |    |    |    |    |    |
| 1Q1Jq                         |       | 0.72                      | 0.70 | 0.88 | 0.84 | 0.62 | 0.72 | 0.76 | 0.59 | 0.64 | 0.62 |     |    |    |    |    |    |    |    |    |    |    |
| 3C2Ap                         |       | 0.82                      | 0.85 | 0.81 | 0.85 | 0.82 | 0.81 | 0.82 | 0.69 | 0.66 | 0.69 |     |    |    |    |    |    |    |    |    |    |    |
| 3C2Aq                         |       | 0.81                      | 0.83 | 0.83 | 0.83 | 0.62 | 0.60 | 0.68 | 0.53 | 0.57 | 0.68 |     |    |    |    |    |    |    |    |    |    |    |
| 3GHBp                         |       | 0.60                      | 0.67 | 0.71 | 0.68 | 0.63 | 0.73 | 0.61 | 0.59 | 0.61 | 0.61 |     |    |    |    |    |    |    |    |    |    |    |
| 3GHBq                         |       | 0.71                      | 0.76 | 0.68 | 0.69 | 0.69 | 0.60 | 0.72 | 0.59 | 0.65 | 0.63 |     |    |    |    |    |    |    |    |    |    |    |
| 1Q1Jp 1Q1Jq                   |       | 0.72                      | 0.75 | 0.86 | 0.88 | 0.64 | 0.77 | 0.82 | 0.62 | 0.69 | 0.68 |     |    |    |    |    |    |    |    |    |    |    |
| 1Q1Jp 3C2Ap                   |       | 0.80                      | 0.85 | 0.84 | 0.87 | 0.80 | 0.82 | 0.84 | 0.67 | 0.78 | 0.71 |     |    |    |    |    |    |    |    |    |    |    |
| 1Q1Jp 3C2Aq                   |       | 0.80                      | 0.80 | 0.84 | 0.87 | 0.67 | 0.74 | 0.81 | 0.64 | 0.67 | 0.69 |     |    |    |    |    |    |    |    |    |    |    |
| 1Q1Jp 3GHBp                   |       | 0.67                      | 0.71 | 0.82 | 0.83 | 0.66 | 0.78 | 0.77 | 0.63 | 0.65 | 0.69 |     |    |    |    |    |    |    |    |    |    |    |
| 1Q1Jp 3GHBq                   |       | 0.74                      | 0.79 | 0.82 | 0.84 | 0.68 | 0.75 | 0.82 | 0.61 | 0.69 | 0.65 |     |    |    |    |    |    |    |    |    |    |    |
| 1Q1Jq 3C2Ap                   |       | 0.82                      | 0.85 | 0.84 | 0.86 | 0.81 | 0.81 | 0.82 | 0.71 | 0.76 | 0.71 |     |    |    |    |    |    |    |    |    |    |    |
| 1Q1Jq 3C2Aq                   |       | 0.79                      | 0.82 | 0.86 | 0.88 | 0.67 | 0.70 | 0.76 | 0.60 | 0.63 | 0.69 |     |    |    |    |    |    |    |    |    |    |    |
| 1Q1Jq 3GHBp                   |       | 0.68                      | 0.71 | 0.83 | 0.81 | 0.66 | 0.75 | 0.70 | 0.61 | 0.64 | 0.67 |     |    |    |    |    |    |    |    |    |    |    |
| 1Q1Jq 3GHBq                   |       | 0.73                      | 0.78 | 0.85 | 0.82 | 0.67 | 0.69 | 0.76 | 0.61 | 0.68 | 0.63 |     |    |    |    |    |    |    |    |    |    |    |
| 3C2Ap 3C2Aq                   |       | 0.81                      | 0.86 | 0.83 | 0.86 | 0.81 | 0.79 | 0.81 | 0.68 | 0.74 | 0.71 |     |    |    |    |    |    |    |    |    |    |    |
| 3C2Ap 3GHBp                   |       | 0.77                      | 0.82 | 0.81 | 0.85 | 0.80 | 0.81 | 0.79 | 0.68 | 0.71 | 0.69 |     |    |    |    |    |    |    |    |    |    |    |
| 3C2Ap 3GHBq                   |       | 0.79                      | 0.85 | 0.81 | 0.85 | 0.80 | 0.80 | 0.81 | 0.68 | 0.76 | 0.69 |     |    |    |    |    |    |    |    |    |    |    |
| 3C2Aq 3GHBp                   |       | 0.73                      | 0.78 | 0.81 | 0.78 | 0.68 | 0.70 | 0.65 | 0.61 | 0.61 | 0.68 |     |    |    |    |    |    |    |    |    |    |    |
| 3C2Aq 3GHBq                   |       | 0.77                      | 0.82 | 0.81 | 0.82 | 0.71 | 0.64 | 0.74 | 0.60 | 0.63 | 0.68 |     |    |    |    |    |    |    |    |    |    |    |
| 3GHBp 3GHBq                   |       | 0.70                      | 0.75 | 0.73 | 0.70 | 0.69 | 0.71 | 0.65 | 0.60 | 0.61 | 0.64 |     |    |    |    |    |    |    |    |    |    |    |
| 1Q1Jp 1Q1Jq 3C2Ap             |       | 0.80                      | 0.85 | 0.85 | 0.87 | 0.79 | 0.82 | 0.83 | 0.68 | 0.79 | 0.73 |     |    |    |    |    |    |    |    |    |    |    |
| 1Q1Jp 1Q1Jq 3C2Aq             |       | 0.78                      | 0.81 | 0.86 | 0.89 | 0.68 | 0.76 | 0.81 | 0.64 | 0.69 | 0.71 |     |    |    |    |    |    |    |    |    |    |    |
| 1Q1Jp 1Q1Jq 3GHBp             |       | 0.70                      | 0.74 | 0.85 | 0.87 | 0.68 | 0.79 | 0.78 | 0.63 | 0.67 | 0.72 |     |    |    |    |    |    |    |    |    |    |    |
| 1Q1Jp 1Q1Jq 3GHBq             |       | 0.74                      | 0.80 | 0.85 | 0.87 | 0.68 | 0.75 | 0.82 | 0.60 | 0.71 | 0.67 |     |    |    |    |    |    |    |    |    |    |    |
| 1Q1Jp 3C2Ap 3C2Aq             |       | 0.80                      | 0.85 | 0.85 | 0.87 | 0.79 | 0.82 | 0.83 | 0.68 | 0.77 | 0.73 |     |    |    |    |    |    |    |    |    |    |    |
| 1Q1Jp 3C2Ap 3GHBp             |       | 0.77                      | 0.82 | 0.84 | 0.86 | 0.78 | 0.83 | 0.82 | 0.68 | 0.73 | 0.71 |     |    |    |    |    |    |    |    |    |    |    |
| 1Q1Jp 3C2Ap 3GHBq             |       | 0.78                      | 0.85 | 0.84 | 0.87 | 0.79 | 0.82 | 0.84 | 0.67 | 0.78 | 0.70 |     |    |    |    |    |    |    |    |    |    |    |
| 1Q1Jp 3C2Aq 3GHBp             |       | 0.74                      | 0.77 | 0.84 | 0.84 | 0.68 | 0.77 | 0.77 | 0.64 | 0.66 | 0.72 |     |    |    |    |    |    |    |    |    |    |    |
| 1Q1Jp 3C2Aq 3GHBq             |       | 0.78                      | 0.82 | 0.84 | 0.86 | 0.70 | 0.75 | 0.81 | 0.63 | 0.68 | 0.69 |     |    |    |    |    |    |    |    |    |    |    |
| 1Q1Jp 3GHBp 3GHBq             |       | 0.73                      | 0.76 | 0.82 | 0.83 | 0.70 | 0.77 | 0.78 | 0.62 | 0.65 | 0.68 |     |    |    |    |    |    |    |    |    |    |    |
| 1Q1Jq 3C2Ap 3C2Aq             |       | 0.81                      | 0.85 | 0.85 | 0.87 | 0.80 | 0.81 | 0.81 | 0.70 | 0.74 | 0.74 |     |    |    |    |    |    |    |    |    |    |    |
| 1Q1Jq 3C2Ap 3GHBp             |       | 0.78                      | 0.83 | 0.83 | 0.86 | 0.79 | 0.81 | 0.79 | 0.69 | 0.71 | 0.72 |     |    |    |    |    |    |    |    |    |    |    |
| 1Q1Jq 3C2Ap 3GHBq             |       | 0.79                      | 0.85 | 0.83 | 0.86 | 0.79 | 0.81 | 0.81 | 0.70 | 0.76 | 0.71 |     |    |    |    |    |    |    |    |    |    |    |
| 1Q1Jq 3C2Aq 3GHBp             |       | 0.74                      | 0.78 | 0.84 | 0.84 | 0.69 | 0.73 | 0.71 | 0.63 | 0.63 | 0.71 |     |    |    |    |    |    |    |    |    |    |    |
| 1Q1Jq 3C2Aq 3GHBq             |       | 0.77                      | 0.82 | 0.84 | 0.86 | 0.69 | 0.69 | 0.77 | 0.63 | 0.66 | 0.69 |     |    |    |    |    |    |    |    |    |    |    |
| 1Q1Jq 3GHBp 3GHBq             |       | 0.72                      | 0.76 | 0.81 | 0.80 | 0.69 | 0.74 | 0.71 | 0.61 | 0.64 | 0.68 |     |    |    |    |    |    |    |    |    |    |    |
| 3C2Ap 3C2Aq 3GHBp             |       | 0.78                      | 0.83 | 0.83 | 0.85 | 0.80 | 0.80 | 0.79 | 0.68 | 0.70 | 0.72 |     |    |    |    |    |    |    |    |    |    |    |
| 3C2Ap 3C2Aq 3GHBq             |       | 0.79                      | 0.86 | 0.82 | 0.86 | 0.80 | 0.80 | 0.81 | 0.69 | 0.74 | 0.71 |     |    |    |    |    |    |    |    |    |    |    |
| 3C2Ap 3GHBp 3GHBq             |       | 0.77                      | 0.84 | 0.81 | 0.85 | 0.78 | 0.81 | 0.79 | 0.68 | 0.71 | 0.68 |     |    |    |    |    |    |    |    |    |    |    |
| 3C2Aq 3GHBp 3GHBq             |       | 0.74                      | 0.80 | 0.80 | 0.78 | 0.71 | 0.70 | 0.68 | 0.62 | 0.60 | 0.69 |     |    |    |    |    |    |    |    |    |    |    |
| 1Q1Jp 1Q1Jq 3C2Ap 3C2Aq       |       | 0.80                      | 0.85 | 0.86 | 0.88 | 0.78 | 0.82 | 0.83 | 0.68 | 0.77 | 0.75 |     |    |    |    |    |    |    |    |    |    |    |
| 1Q1Jp 1Q1Jq 3C2Ap 3GHBp       |       | 0.78                      | 0.83 | 0.84 | 0.87 | 0.78 | 0.83 | 0.82 | 0.68 | 0.74 | 0.74 |     |    |    |    |    |    |    |    |    |    |    |
| 1Q1Jp 1Q1Jq 3C2Ap 3GHBq       |       | 0.79                      | 0.85 | 0.85 | 0.87 | 0.78 | 0.82 | 0.83 | 0.67 | 0.78 | 0.72 |     |    |    |    |    |    |    |    |    |    |    |
| 1Q1Jp 1Q1Jq 3C2Aq 3GHBp       |       | 0.75                      | 0.78 | 0.86 | 0.87 | 0.70 | 0.78 | 0.79 | 0.64 | 0.67 | 0.75 |     |    |    |    |    |    |    |    |    |    |    |
| 1Q1Jp 1Q1Jq 3C2Aq 3GHBq       |       | 0.78                      | 0.82 | 0.86 | 0.88 | 0.70 | 0.75 | 0.81 | 0.63 | 0.70 | 0.71 |     |    |    |    |    |    |    |    |    |    |    |
| 1Q1Jp 1Q1Jq 3GHBp 3GHBq       |       | 0.74                      | 0.77 | 0.84 | 0.86 | 0.70 | 0.79 | 0.79 | 0.62 | 0.67 | 0.71 |     |    |    |    |    |    |    |    |    |    |    |
| 1Q1Jp 3C2Ap 3C2Aq 3GHBp       |       | 0.78                      | 0.83 | 0.85 | 0.87 | 0.78 | 0.83 | 0.81 | 0.68 | 0.73 | 0.73 |     |    |    |    |    |    |    |    |    |    |    |
| 1Q1Jp 3C2Ap 3C2Aq 3GHBq       |       | 0.78                      | 0.85 | 0.84 | 0.87 | 0.79 | 0.82 | 0.83 | 0.68 | 0.77 | 0.72 |     |    |    |    |    |    |    |    |    |    |    |
| 1Q1Jp 3C2Ap 3GHBp 3GHBq       |       | 0.77                      | 0.83 | 0.84 | 0.87 | 0.78 | 0.83 | 0.82 | 0.67 | 0.73 | 0.70 |     |    |    |    |    |    |    |    |    |    |    |
| 1Q1Jp 3C2Aq 3GHBp 3GHBq       |       | 0.75                      | 0.80 | 0.83 | 0.84 | 0.71 | 0.77 | 0.78 | 0.64 | 0.65 | 0.72 |     |    |    |    |    |    |    |    |    |    |    |
| 1Q1Jq 3C2Ap 3C2Aq 3GHBp       |       | 0.79                      | 0.84 | 0.84 | 0.86 | 0.79 | 0.81 | 0.79 | 0.69 | 0.71 | 0.74 |     |    |    |    |    |    |    |    |    |    |    |
| 1Q1Jq 3C2Ap 3C2Aq 3GHBq       |       | 0.80                      | 0.86 | 0.84 | 0.86 | 0.79 | 0.81 | 0.81 | 0.70 | 0.75 | 0.73 |     |    |    |    |    |    |    |    |    |    |    |
| 1Q1Jq 3C2Ap 3GHBp 3GHBq       |       | 0.78                      | 0.84 | 0.82 | 0.85 | 0.78 | 0.81 | 0.79 | 0.69 | 0.72 | 0.71 |     |    |    |    |    |    |    |    |    |    |    |
| 1Q1Jq 3C2Aq 3GHBp 3GHBq       |       | 0.75                      | 0.80 | 0.83 | 0.84 | 0.70 | 0.74 | 0.72 | 0.63 | 0.63 | 0.72 |     |    |    |    |    |    |    |    |    |    |    |
| 3C2Ap 3C2Aq 3GHBp 3GHBq       |       | 0.77                      | 0.84 | 0.82 | 0.85 | 0.78 | 0.80 | 0.79 | 0.69 | 0.70 | 0.71 |     |    |    |    |    |    |    |    |    |    |    |
| 1Q1Jp 1Q1Jq 3C2Ap 3C2Aq 3GHBp |       | 0.79                      | 0.83 | 0.85 | 0.87 | 0.77 | 0.83 | 0.81 | 0.69 | 0.73 | 0.76 |     |    |    |    |    |    |    |    |    |    |    |
| 1Q1Jp 1Q1Jq 3C2Ap 3C2Aq 3GHBq |       | 0.79                      | 0.85 | 0.85 | 0.88 | 0.78 | 0.82 | 0.83 | 0.68 | 0.77 | 0.74 |     |    |    |    |    |    |    |    |    |    |    |
| 1Q1Jp 1Q1Jq 3C2Ap 3GHBp 3GHBq |       | 0.78                      | 0.84 | 0.84 | 0.87 | 0.77 | 0.83 | 0.82 | 0.68 | 0.74 | 0.73 |     |    |    |    |    |    |    |    |    |    |    |
| 1Q1Jp 1Q1Jq 3C2Aq 3GHBp 3GHBq |       | 0.76                      | 0.80 | 0.85 | 0.87 | 0.71 | 0.78 | 0.79 | 0.64 | 0.67 | 0.74 |     |    |    |    |    |    |    |    |    |    |    |
| 1Q1Jp 3C2Ap 3C2Aq 3GHBp 3GHBq |       | 0.78                      | 0.84 | 0.84 | 0.87 | 0.78 | 0.83 | 0.81 | 0.69 | 0.73 | 0.73 |     |    |    |    |    |    |    |    |    |    |    |
| 1Q1Jq 3C2Ap 3C2Aq 3GHBp 3GHBq |       | 0.79                      | 0.85 | 0.83 | 0.86 | 0.78 | 0.81 | 0.79 | 0.70 | 0.71 | 0.74 |     |    |    |    |    |    |    |    |    |    |    |
| 1Q1Jp 1Q1Jq 3C2Ap 3C2Aq 3GHBp |       | 0.79                      | 0.84 | 0.85 | 0.87 | 0.77 | 0.83 | 0.81 | 0.69 | 0.73 | 0.75 |     |    |    |    |    |    |    |    |    |    |    |

b

| Docking peptide: | Start | mAb 447-52D conformation: |      |      |      |      |      |      |      |      |      |     |    |    |    |    |    |    |    |    |    |    |
|------------------|-------|---------------------------|------|------|------|------|------|------|------|------|------|-----|----|----|----|----|----|----|----|----|----|----|
|                  |       | 9                         | 9    | 9    | 9    | 8    | 8    | 8    | 7    | 7    | 6    | End | 22 | 21 | 20 | 19 | 21 | 20 | 19 | 20 | 19 | 19 |
| 1Q1Jp            |       | 0.07                      | 0.07 | 0.06 | 0.05 | 0.08 | 0.06 | 0.06 | 0.08 | 0.07 | 0.07 |     |    |    |    |    |    |    |    |    |    |    |
| 1Q1Jq            |       | 0.07                      | 0.07 | 0.05 | 0.05 | 0.08 | 0.07 | 0.07 | 0.08 | 0.08 | 0.08 |     |    |    |    |    |    |    |    |    |    |    |
| 3C2Ap            |       | 0.06                      | 0.05 | 0.06 | 0.05 | 0.06 | 0.06 | 0.06 | 0.07 | 0.06 | 0.07 |     |    |    |    |    |    |    |    |    |    |    |
| 3C2Aq            |       | 0.06                      | 0.05 | 0.06 | 0.06 | 0.08 | 0.08 | 0.07 | 0.08 | 0.08 | 0.07 |     |    |    |    |    |    |    |    |    |    |    |
| 3GHBp            |       | 0.08                      | 0.08 | 0.07 | 0.07 | 0.07 | 0.07 | 0.08 | 0.08 | 0.08 | 0.08 |     |    |    |    |    |    |    |    |    |    |    |
| 3GHBq            |       | 0.07                      | 0.07 | 0.07 | 0.08 | 0.07 | 0.08 | 0.07 | 0.08 | 0.08 | 0.08 |     |    |    |    |    |    |    |    |    |    |    |
| 1Q1Jp 1Q1Jq      |       | 0.07                      | 0.07 | 0.05 | 0.04 | 0.08 | 0.06 | 0.06 | 0.08 | 0.07 | 0.07 |     |    |    |    |    |    |    |    |    |    |    |
| 1Q1Jp 3C2Ap      |       | 0.07                      | 0.05 | 0.06 | 0.05 | 0.07 | 0.06 | 0.06 | 0.08 | 0.06 | 0.07 |     |    |    |    |    |    |    |    |    |    |    |
| 1Q1Jp 3C2Aq      |       | 0.06                      | 0.06 | 0.05 | 0.05 | 0.08 | 0.07 | 0.06 | 0.08 | 0.07 | 0.07 |     |    |    |    |    |    |    |    |    |    |    |
| 1Q1Jp 3GHBp      |       | 0.08                      | 0.07 | 0.06 | 0.05 | 0.07 | 0.06 | 0.   |      |      |      |     |    |    |    |    |    |    |    |    |    |    |
