# Supplementary material for: Computational Prediction of Neutralization Epitopes Targeted by Human Anti-V3 HIV Monoclonal Antibodies
Source: PubMed Central journal article supplement (PMC3934971; doi:10.1371/journal.pone.0089987), 2014-02-25

Supplementary Figure S4

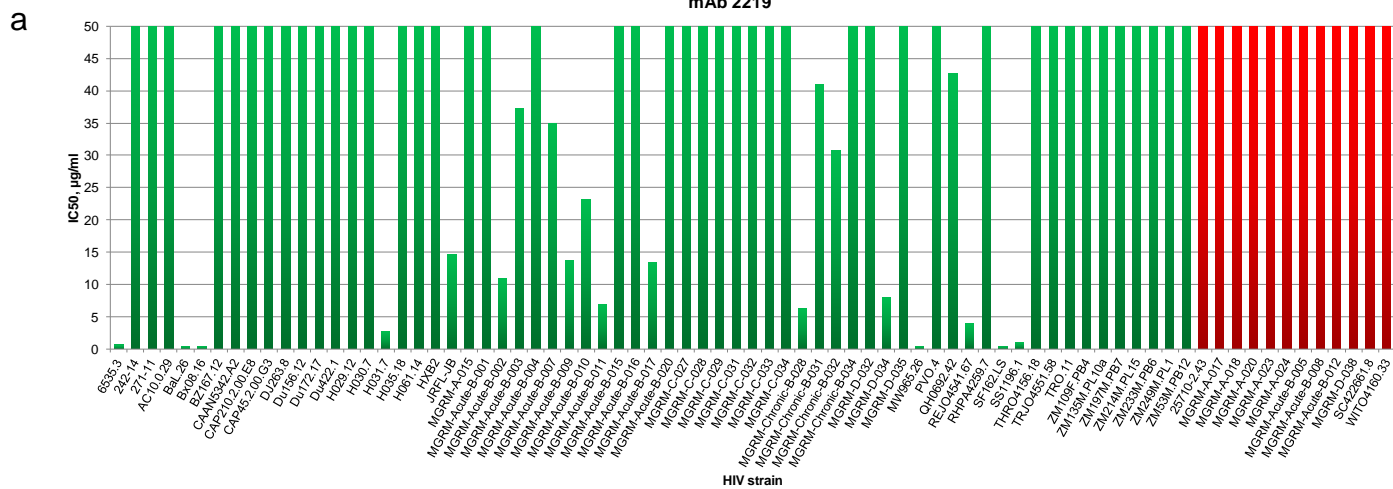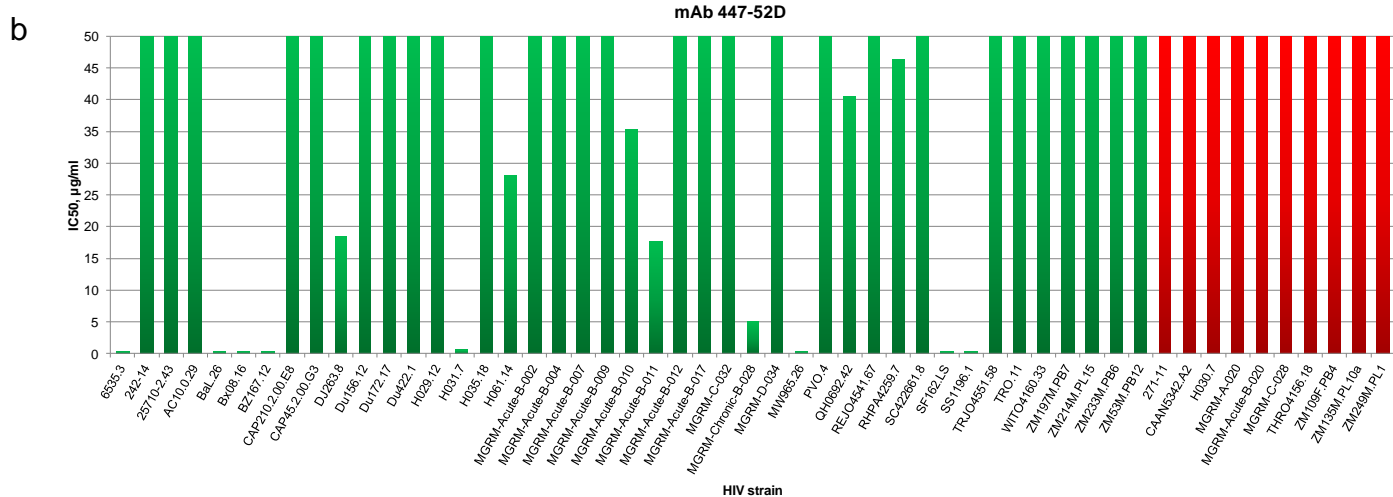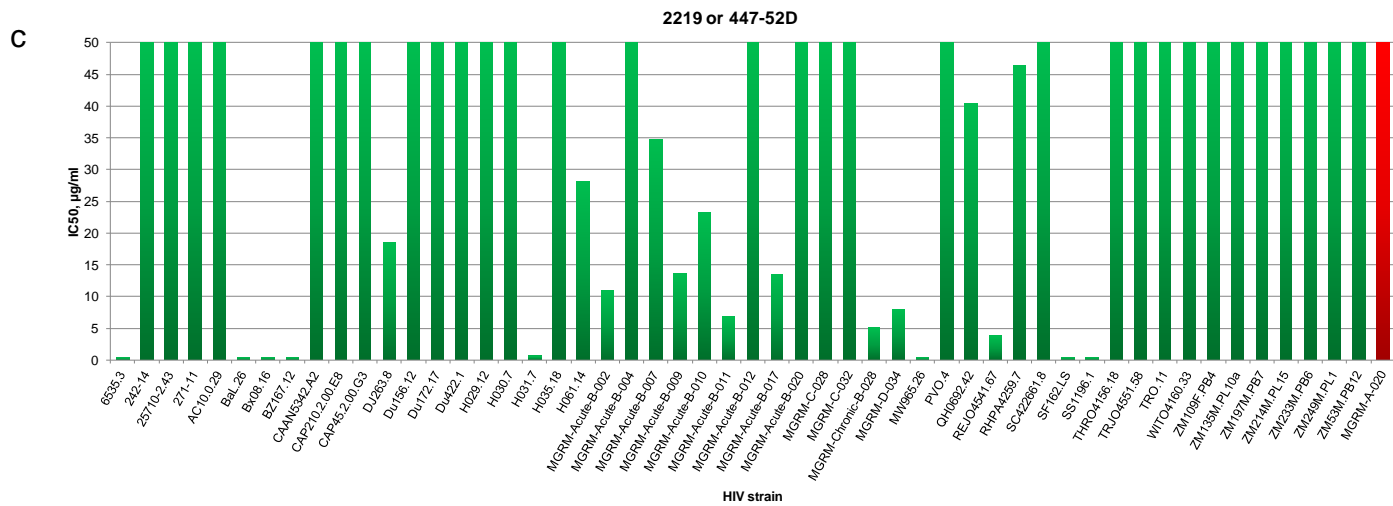

Supplement: pone.0089987.s004.pdf [file pone.0089987.s004.pdf]
