# Supplementary material for: Computational Prediction of Neutralization Epitopes Targeted by Human Anti-V3 HIV Monoclonal Antibodies
Source: PubMed Central journal article supplement (PMC3934971; doi:10.1371/journal.pone.0089987), 2014-02-25
Supplement: pone.0089987.s005.pdf [file pone.0089987.s005.pdf]

Supplementary Figure S5

a

|                 | MN   | UG1033 | UR29 | Self-docking | Cross-docking |
|-----------------|------|--------|------|--------------|---------------|
| 2B0S            | 1.41 | 3.04   | 5.41 | 1.41         | 4.23          |
| 2B1A            | 1.57 | 3.09   | 4.79 | 3.09         | 3.18          |
| 2B1H            | 1.65 | 3.72   | 4.74 | 4.74         | 2.69          |
| <b>Average:</b> |      |        |      | 3.08         | 3.37          |

b

|                 | MN   | UG1033 | W2RW020 (10aa) | W2RW020 (9aa) | Self-docking | Cross-docking |
|-----------------|------|--------|----------------|---------------|--------------|---------------|
| 1Q1Jp           | 2.08 | 5.70   | 1.48           | 1.66          | 2.08         | 2.95          |
| 1Q1Jq           | 1.78 | 7.07   | 3.20           | 1.68          | 1.78         | 3.98          |
| 3C2Ap           | 1.69 | 4.65   | 3.04           | 1.19          | 4.65         | 1.98          |
| 3C2Aq           | 1.79 | 2.70   | 2.22           | 1.65          | 2.70         | 1.89          |
| 3GHBp           | 3.01 | 6.11   | 1.76           | 1.55          | 1.76         | 3.56          |
| 3GHBq           | 2.52 | 6.75   | 2.93           | 2.31          | 2.31         | 4.06          |
| <b>Average:</b> |      |        |                |               | 2.55         | 3.07          |

c

|                 | MN   | UG1033 | UR29 | Self-docking | Cross-docking |
|-----------------|------|--------|------|--------------|---------------|
| 2B0S            | 0.41 | 0.65   | 0.72 | 0.41         | 0.68          |
| 2B1A            | 0.49 | 0.55   | 0.65 | 0.55         | 0.57          |
| 2B1H            | 0.60 | 0.65   | 0.55 | 0.55         | 0.63          |
| <b>Average:</b> |      |        |      | 0.50         | 0.63          |

d

|                 | MN   | UG1033 | W2RW020 (10aa) | W2RW020 (9aa) | Self-docking | Cross-docking |
|-----------------|------|--------|----------------|---------------|--------------|---------------|
| 1Q1Jp           | 2.08 | 3.52   | 1.48           | 1.66          | 2.08         | 2.22          |
| 1Q1Jq           | 1.78 | 5.70   | 3.20           | 1.68          | 1.78         | 3.53          |
| 3C2Ap           | 1.69 | 1.89   | 3.04           | 1.19          | 1.89         | 1.98          |
| 3C2Aq           | 1.79 | 1.35   | 2.22           | 1.65          | 1.35         | 1.89          |
| 3GHBp           | 3.01 | 4.20   | 1.76           | 1.55          | 1.76         | 2.92          |
| 3GHBq           | 2.52 | 2.92   | 2.93           | 2.31          | 2.31         | 2.79          |
| <b>Average:</b> |      |        |                |               | 1.86         | 2.55          |
