# Supplementary material for: Computational Prediction of Neutralization Epitopes Targeted by Human Anti-V3 HIV Monoclonal Antibodies
Source: PubMed Central journal article supplement (PMC3934971; doi:10.1371/journal.pone.0089987), 2014-02-25
Supplement: pone.0089987.s007.pdf [file pone.0089987.s007.pdf]

**Supplementary Table S1:** List of crystal structures of antibody-peptide complexes for mAbs 2219 and 447-52D used in the current study.

| mAb     | Crystal Structure PDB ID | Viral Strain of gp120 Peptide | Sequence of gp120 peptide | Reference             | Conformation ID |
|---------|--------------------------|-------------------------------|---------------------------|-----------------------|-----------------|
| 2219    | 2B0S                     | MN                            | KRKRIHIGPGRAFYT           | Stanfield et al. 2006 | 2B0S            |
| 2219    | 2B1A                     | UG1033                        | TRKSIHLGPGRAFAT           | Stanfield et al. 2006 | 2B1A            |
| 2219    | 2B1H                     | UR29                          | TKKSIKIRPRQAFYAT          | Stanfield et al. 2006 | 2B1H            |
| 447-52D | 3C2A                     | UG1033                        | KSIHLGPGRAFYA             | Dhillon et al. 2008   | 3C2Ap           |
| 447-52D | 3C2A                     | UG1033                        | KSIHLGPGRAFYA             | Dhillon et al. 2008   | 3C2Aq           |
| 447-52D | 1Q1J                     | MN                            | KRIHIGPGRA                | Stanfield et al. 2004 | 1Q1Jp           |
| 447-52D | 1Q1J                     | MN                            | KRIHIGPGRA                | Stanfield et al. 2004 | 1Q1Jq           |
| 447-52D | 3GHB                     | W2RW020                       | KGVRIGPGQA                | Burke et al. 2009     | 3GHBp           |
| 447-52D | 3GHB                     | W2RW020                       | KGVRIGPGQ                 | Burke et al. 2009     | 3GHBq           |

**Note:** Crystal Structure PDB ID is a Protein Data Bank (<http://www.rcsb.org>) identification code of an antibody-peptide complex. Conformation ID is the antibody conformation identification code used in the text and figures of this paper.
