# Supplementary material for: Computational Prediction of Neutralization Epitopes Targeted by Human Anti-V3 HIV Monoclonal Antibodies
Source: PubMed Central journal article supplement (PMC3934971; doi:10.1371/journal.pone.0089987), 2014-02-25
Supplement: pone.0089987.s008.pdf [file pone.0089987.s008.pdf]

**Supplementary Table S2:** Comparison of the Method of Dynamic Epitopes to the Signature Motif Method.

---

| <b>Method</b>                          | <b>Signature Motif Method (SMM)</b> |             |                | <b>Method of Dynamic Epitopes (MDE)</b> |             |                |                |
|----------------------------------------|-------------------------------------|-------------|----------------|-----------------------------------------|-------------|----------------|----------------|
|                                        | <b>mAb</b>                          | <b>2219</b> | <b>447-52D</b> | <b>Average</b>                          | <b>2219</b> | <b>447-52D</b> | <b>Average</b> |
| Accuracy (ACC)                         |                                     | 0.78        | 0.75           | 0.76                                    | 0.93        | 0.82           | 0.87           |
| Matthews Correlation Coefficient (MCC) |                                     | 0.53        | 0.59           | 0.56                                    | 0.82        | 0.63           | 0.72           |

---
