# Supplementary material for: Computational Prediction of Neutralization Epitopes Targeted by Human Anti-V3 HIV Monoclonal Antibodies
Source: PubMed Central journal article supplement (PMC3934971; doi:10.1371/journal.pone.0089987), 2014-02-25
Supplement: pone.0089987.s009.pdf [file pone.0089987.s009.pdf]

**Supplementary Table S3:** Subtype specific estimates of epitope masking for mAb 2219 and 447-52D.**(a) Subtype specific masking of 2219 epitope**

| Subtype                               | A     | B    | C    | D    | G   | CRF01_AE | CRF02_AG | Total |
|---------------------------------------|-------|------|------|------|-----|----------|----------|-------|
| Number of viruses tested              | 7     | 43   | 21   | 4    | 0   | 0        | 2        | 77    |
| Number of viruses with epitope        | 2     | 38   | 20   | 3    | 0   | 0        | 2        | 65    |
| Number of viruses with masked epitope | 2     | 19   | 19   | 2    | 0   | 0        | 2        | 44    |
| Masked epitopes percentage            | 100.0 | 50.0 | 95.0 | 66.7 | n/a | n/a      | 100.0    | 67.7  |

**(b) Subtype specific masking of 447-52D epitope**

| Subtype                               | A   | B    | C    | D     | G   | CRF01_AE | CRF02_AG | Total |
|---------------------------------------|-----|------|------|-------|-----|----------|----------|-------|
| Number of viruses tested              | 2   | 32   | 16   | 1     | 0   | 0        | 2        | 53    |
| Number of viruses with epitope        | 1   | 28   | 12   | 1     | 0   | 0        | 1        | 43    |
| Number of viruses with masked epitope | 0   | 15   | 11   | 1     | 0   | 0        | 1        | 28    |
| Masked epitopes percentage            | 0.0 | 53.6 | 91.7 | 100.0 | n/a | n/a      | 100.0    | 65.1  |

**(c) Subtype specific masking of both 2219 and 447-52D epitopes**

| Subtype                                     | A   | B    | C    | D   | G   | CRF01_AE | CRF02_AG | Total |
|---------------------------------------------|-----|------|------|-----|-----|----------|----------|-------|
| Number of viruses tested                    | 2   | 32   | 16   | 1   | 0   | 0        | 2        | 53    |
| Number of viruses with at least one epitope | 1   | 32   | 16   | 1   | 0   | 0        | 2        | 52    |
| Number of viruses with masked epitopes      | 0   | 14   | 15   | 0   | 0   | 0        | 2        | 31    |
| Masked epitopes percentage                  | 0.0 | 43.8 | 93.8 | 0.0 | n/a | n/a      | 100.0    | 59.6  |

**Note:** Panel (c) shows subtype specific masking of both epitopes: i.e. value 43.8% for subtype B suggests that in 56.2 (=100 - 43.8) percent of cases at least one of the two epitopes is unmasked. Bear in mind that the sample size for the subtypes A, D, G, and CRF01\_AE and CRF02\_AG is very small, and therefore, no conclusion should be made based on the their specific numbers.
